# Supplementary material for: Spatially differentiated midpoint indicator for marine eutrophication of waterborne emissions in Sweden
Source: Springer Nature journal article supplement (doi:10.1007/s11367-017-1298-7), 2017-03-11
Supplement: MOESM1 [file 12136074]

Online Resource 1: Marine recipient sub-basins, transport factors and characterisation factors for waterborne N and P emissions from agriculture, for marine eutrophication impact assessment for different sites in Sweden.

Electronic supplement to article:

Spatially differentiated midpoint indicator for marine eutrophication of waterborne emissions in Sweden

International Journal of Life Cycle Assessment

Kajsa Henryson<sup>1\*</sup>, Per-Anders Hansson<sup>1</sup>, Cecilia Sundberg<sup>1,2</sup>

<sup>1</sup>Department of Energy and Technology, Swedish University of Agricultural Sciences (SLU), P.O. Box 7032, 750 07 Uppsala, Sweden

<sup>2</sup>Division of Industrial Ecology, Department of Sustainable Development, Environmental Science and Engineering, Royal Institute of Technology (KTH), Teknikringen 34, 100 44 Stockholm, Sweden

\*Corresponding author. E-mail: [kajsa.henryson@slu.se](mailto:kajsa.henryson@slu.se)

GIS files to identify the geographic locations of each zone is available through <http://www.smed.se/vatten/data/plc5> "Rapporteringsområden (PLC5-område)"

| Catchment-id (PLC5-id) | Sub-basin recipient | Transport factor, N [-] | Transport factor, P [-] | Marine eutrophication from N release [kg Neq/kg N] | Marine eutrophication from P release [kg Neq/kg P] |
|------------------------|---------------------|-------------------------|-------------------------|----------------------------------------------------|----------------------------------------------------|
| 001004-001             | Bothnian Bay        | 0.832                   | 0.995                   | 0.832                                              | 7.18987                                            |
| 004001-001             | Bothnian Bay        | 0.838                   | 0.998                   | 0.838                                              | 7.211548                                           |
| 004008-001             | Bothnian Bay        | 0.815                   | 0.993                   | 0.815                                              | 7.175418                                           |
| 008004-001             | Bothnian Bay        | 0.827                   | 0.998                   | 0.827                                              | 7.211548                                           |
| 008011-001             | Bothnian Bay        | 0.819                   | 0.996                   | 0.819                                              | 7.197096                                           |
| 011008-001             | Bothnian Bay        | 0.828                   | 0.999                   | 0.828                                              | 7.218774                                           |
| 011017-001             | Bothnian Bay        | 0.815                   | 0.994                   | 0.815                                              | 7.182644                                           |
| 017011-001             | Bothnian Bay        | 0.694                   | 0.979                   | 0.694                                              | 7.074254                                           |
| 017022-001             | Bothnian Bay        | 0.817                   | 0.994                   | 0.817                                              | 7.182644                                           |
| 022017-001             | Bothnian Bay        | 0.414                   | 0.971                   | 0.414                                              | 7.016446                                           |
| 022025-001             | Bothnian Bay        | 0.835                   | 1,000                   | 0.835                                              | 7.226                                              |
| 025026-001             | Bothnian Bay        | 0.833                   | 0.996                   | 0.833                                              | 7.197096                                           |
| 026025-001             | Bothnian Bay        | 0.839                   | 0.983                   | 0.839                                              | 7.103158                                           |
| 026030-001             | Bothnian Sea        | 0.827                   | 0.995                   | 0.827                                              | 7.18987                                            |
| 030026-001             | Bothnian Sea        | 0.73                    | 0.991                   | 0.73                                               | 7.160966                                           |
| 030035-001             | Bothnian Sea        | 0.804                   | 0.995                   | 0.804                                              | 7.18987                                            |
| 035030-001             | Bothnian Sea        | 0.859                   | 0.985                   | 0.859                                              | 7.11761                                            |
| 035037-001             | Bothnian Sea        | 0.875                   | 0.996                   | 0.875                                              | 7.197096                                           |
| 037035-001             | Bothnian Sea        | 0.86                    | 0.988                   | 0.86                                               | 7.139288                                           |
| 037038-001             | Bothnian Sea        | 0.876                   | 1,000                   | 0.876                                              | 7.226                                              |
| 038037-001             | Bothnian Sea        | 0.865                   | 0.986                   | 0.865                                              | 7.124836                                           |
| 038039-001             | Bothnian Sea        | 0.87                    | 1,000                   | 0.87                                               | 7.226                                              |
| 039038-001             | Bothnian Sea        | 0.879                   | 0.995                   | 0.879                                              | 7.18987                                            |
| 039042-001             | Bothnian Sea        | 0.87                    | 0.998                   | 0.87                                               | 7.211548                                           |
| 042039-001             | Bothnian Sea        | 0.686                   | 0.981                   | 0.686                                              | 7.088706                                           |
| 042044-001             | Bothnian Sea        | 0.852                   | 0.999                   | 0.852                                              | 7.218774                                           |
| 044046-001             | Bothnian Sea        | 0.855                   | 0.994                   | 0.855                                              | 7.182644                                           |
| 046050-001             | Bothnian Sea        | 0.839                   | 0.992                   | 0.839                                              | 7.168192                                           |
| 050046-001             | Bothnian Sea        | 0.831                   | 0.992                   | 0.831                                              | 7.168192                                           |
| 050053-001             | Bothnian Sea        | 0.848                   | 0.988                   | 0.848                                              | 7.139288                                           |
| 053050-001             | Bothnian Sea        | 0.828                   | 0.995                   | 0.828                                              | 7.18987                                            |
| 053056-001             | Bothnian Sea        | 0.823                   | 0.997                   | 0.823                                              | 7.204322                                           |
| 056053-001             | Bothnian Sea        | 0.811                   | 0.999                   | 0.811                                              | 7.218774                                           |
| 056058-001             | Bothnian Sea        | 0.817                   | 0.994                   | 0.817                                              | 7.182644                                           |
| 058056-001             | Bothnian Sea        | 0.819                   | 0.999                   | 0.819                                              | 7.218774                                           |
| 058062-001             | Baltic Proper       | 0.749                   | 0.975                   | 0.749                                              | 7.04535                                            |
| 062058-001             | Baltic Proper       | 0.711                   | 0.993                   | 0.711                                              | 7.175418                                           |
| 062063-001             | Baltic Proper       | 0.848                   | 0.941                   | 0.848                                              | 6.799666                                           |
| 063062-001             | Baltic Proper       | 0.757                   | 0.998                   | 0.757                                              | 7.211548                                           |
| 063066-001             | Baltic Proper       | 0.749                   | 0.98                    | 0.749                                              | 7.08148                                            |
| 066063-001             | Baltic Proper       | 0.743                   | 1,000                   | 0.743                                              | 7.226                                              |
| 067068-001             | Baltic Proper       | 0.805                   | 0.992                   | 0.805                                              | 7.168192                                           |
| 068067-001             | Baltic Proper       | 0.743                   | 1,000                   | 0.743                                              | 7.226                                              |
| 068069-001             | Baltic Proper       | 0.745                   | 0.984                   | 0.745                                              | 7.110384                                           |
| 069068-001             | Baltic Proper       | 0.737                   | 1,000                   | 0.737                                              | 7.226                                              |
| 069071-001             | Baltic Proper       | 0.718                   | 0.933                   | 0.718                                              | 6.741858                                           |
| 071069-001             | Baltic Proper       | 0.747                   | 0.999                   | 0.747                                              | 7.218774                                           |

|            |               |       |       |       |          |
|------------|---------------|-------|-------|-------|----------|
| 071074-001 | Baltic Proper | 0.738 | 0.982 | 0.738 | 7.095932 |
| 074071-001 | Baltic Proper | 0.706 | 0.999 | 0.706 | 7.218774 |
| 074076-001 | Baltic Proper | 0.782 | 0.999 | 0.782 | 7.218774 |
| 076074-001 | Baltic Proper | 0.76  | 0.982 | 0.76  | 7.095932 |
| 076079-001 | Baltic Proper | 0.792 | 0.999 | 0.792 | 7.218774 |
| 079076-001 | Baltic Proper | 0.786 | 0.998 | 0.786 | 7.211548 |
| 079080-001 | Baltic Proper | 0.805 | 0.997 | 0.805 | 7.204322 |
| 080079-001 | Baltic Proper | 0.781 | 0.999 | 0.781 | 7.218774 |
| 080082-001 | Baltic Proper | 0.798 | 0.968 | 0.798 | 6.994768 |
| 082080-001 | Baltic Proper | 0.778 | 0.999 | 0.778 | 7.218774 |
| 082087-001 | Baltic Proper | 0.797 | 0.976 | 0.797 | 7.052576 |
| 087082-001 | Baltic Proper | 0.77  | 0.999 | 0.77  | 7.218774 |
| 087089-001 | Baltic Proper | 0.739 | 0.997 | 0.739 | 7.204322 |
| 089087-001 | Baltic Proper | 0.785 | 0.998 | 0.785 | 7.211548 |
| 089090-001 | Baltic Proper | 0.797 | 0.997 | 0.797 | 7.204322 |
| 090089-001 | Baltic Proper | 0.72  | 0.993 | 0.72  | 7.175418 |
| 090094-001 | Öresund       | 0.752 | 0.996 | 0.752 | 0        |
| 094090-001 | Öresund       | 0.73  | 0.992 | 0.73  | 0        |
| 094095-001 | Öresund       | 0.776 | 0.998 | 0.776 | 0        |
| 095097-001 | Kattegat      | 0.809 | 0.998 | 0.809 | 0        |
| 097095-001 | Kattegat      | 0.747 | 0.997 | 0.747 | 0        |
| 097101-001 | Kattegat      | 0.788 | 0.998 | 0.788 | 0        |
| 100-001    | Kattegat      | 0.825 | 0.941 | 0.825 | 0        |
| 100-002    | Kattegat      | 0.87  | 0.996 | 0.87  | 0        |
| 100-003    | Kattegat      | 0.883 | 0.996 | 0.883 | 0        |
| 10-001     | Bothnian Bay  | 0.742 | 0.987 | 0.742 | 7.132062 |
| 1-002      | Bothnian Bay  | 0.758 | 0.872 | 0.758 | 6.301072 |
| 1-005      | Bothnian Bay  | 0.678 | 0.962 | 0.678 | 6.951412 |
| 1-008      | Bothnian Bay  | 0.588 | 0.996 | 0.588 | 7.197096 |
| 101-001    | Kattegat      | 0.797 | 0.932 | 0.797 | 0        |
| 101-002    | Kattegat      | 0.841 | 0.938 | 0.841 | 0        |
| 101-003    | Kattegat      | 0.677 | 0.914 | 0.677 | 0        |
| 101-004    | Kattegat      | 0.689 | 0.825 | 0.689 | 0        |
| 101-005    | Kattegat      | 0.79  | 0.908 | 0.79  | 0        |
| 101-006    | Kattegat      | 0.576 | 0.752 | 0.576 | 0        |
| 101-007    | Kattegat      | 0.87  | 0.992 | 0.87  | 0        |
| 101-008    | Kattegat      | 0.631 | 0.835 | 0.631 | 0        |
| 101-009    | Kattegat      | 0.869 | 0.989 | 0.869 | 0        |
| 101-010    | Kattegat      | 0.852 | 0.996 | 0.852 | 0        |
| 101-011    | Kattegat      | 0.869 | 0.988 | 0.869 | 0        |
| 101-012    | Kattegat      | 0.875 | 0.996 | 0.875 | 0        |
| 101097-001 | Kattegat      | 0.75  | 0.997 | 0.75  | 0        |
| 101103-001 | Kattegat      | 0.801 | 0.998 | 0.801 | 0        |
| 1-013      | Bothnian Bay  | 0.588 | 0.996 | 0.588 | 7.197096 |
| 1-020      | Bothnian Bay  | 0.646 | 0.996 | 0.646 | 7.197096 |
| 102-001    | Kattegat      | 0.864 | 0.995 | 0.864 | 0        |
| 1-021      | Bothnian Bay  | 0.612 | 0.999 | 0.612 | 7.218774 |
| 1-023      | Bothnian Bay  | 0.606 | 0.999 | 0.606 | 7.218774 |
| 1-024      | Bothnian Bay  | 0.628 | 0.997 | 0.628 | 7.204322 |
| 1-025      | Bothnian Bay  | 0.598 | 0.995 | 0.598 | 7.18987  |

|            |              |       |       |       |          |
|------------|--------------|-------|-------|-------|----------|
| 1-026      | Bothnian Bay | 0.663 | 0.997 | 0.663 | 7.204322 |
| 103-001    | Kattegat     | 0.374 | 0.28  | 0.374 | 0        |
| 103-002    | Kattegat     | 0.496 | 0.392 | 0.496 | 0        |
| 103-003    | Kattegat     | 0.497 | 0.393 | 0.497 | 0        |
| 103-004    | Kattegat     | 0.798 | 0.985 | 0.798 | 0        |
| 103-005    | Kattegat     | 0.606 | 0.63  | 0.606 | 0        |
| 103-006    | Kattegat     | 0.754 | 0.924 | 0.754 | 0        |
| 103-007    | Kattegat     | 0.877 | 0.982 | 0.877 | 0        |
| 103-008    | Kattegat     | 0.886 | 0.978 | 0.886 | 0        |
| 103-009    | Kattegat     | 0.656 | 0.707 | 0.656 | 0        |
| 103-010    | Kattegat     | 0.693 | 0.745 | 0.693 | 0        |
| 103-011    | Kattegat     | 0.858 | 0.961 | 0.858 | 0        |
| 103-012    | Kattegat     | 0.82  | 0.929 | 0.82  | 0        |
| 103-013    | Kattegat     | 0.863 | 0.982 | 0.863 | 0        |
| 1-031      | Bothnian Bay | 0.637 | 0.999 | 0.637 | 7.218774 |
| 103107-001 | Kattegat     | 0.796 | 0.99  | 0.796 | 0        |
| 1-032      | Bothnian Bay | 0.639 | 1,000 | 0.639 | 7.226    |
| 1-033      | Bothnian Bay | 0.628 | 0.999 | 0.628 | 7.218774 |
| 1-034      | Bothnian Bay | 0.62  | 0.999 | 0.62  | 7.218774 |
| 1-037      | Bothnian Bay | 0.61  | 0.999 | 0.61  | 7.218774 |
| 1-038      | Bothnian Bay | 0.626 | 0.998 | 0.626 | 7.211548 |
| 1-039      | Bothnian Bay | 0.617 | 0.998 | 0.617 | 7.211548 |
| 1-040      | Bothnian Bay | 0.68  | 0.997 | 0.68  | 7.204322 |
| 104-001    | Kattegat     | 0.748 | 0.974 | 0.748 | 0        |
| 1-042      | Bothnian Bay | 0.821 | 0.995 | 0.821 | 7.18987  |
| 1-043      | Bothnian Bay | 0.808 | 0.995 | 0.808 | 7.18987  |
| 1-045      | Bothnian Bay | 0.81  | 0.991 | 0.81  | 7.160966 |
| 1-046      | Bothnian Bay | 0.817 | 0.992 | 0.817 | 7.168192 |
| 1-047      | Bothnian Bay | 0.828 | 0.992 | 0.828 | 7.168192 |
| 105-001    | Kattegat     | 0.762 | 0.972 | 0.762 | 0        |
| 105-002    | Kattegat     | 0.602 | 0.309 | 0.602 | 0        |
| 105-003    | Kattegat     | 0.755 | 0.567 | 0.755 | 0        |
| 105-004    | Kattegat     | 0.847 | 0.973 | 0.847 | 0        |
| 105-005    | Kattegat     | 0.763 | 0.547 | 0.763 | 0        |
| 105-006    | Kattegat     | 0.543 | 0.554 | 0.543 | 0        |
| 105-007    | Kattegat     | 0.661 | 0.309 | 0.661 | 0        |
| 105-008    | Kattegat     | 0.788 | 0.989 | 0.788 | 0        |
| 106-001    | Kattegat     | 0.537 | 0.316 | 0.537 | 0        |
| 106-002    | Kattegat     | 0.679 | 0.415 | 0.679 | 0        |
| 106-003    | Kattegat     | 0.73  | 0.44  | 0.73  | 0        |
| 106-004    | Kattegat     | 0.595 | 0.422 | 0.595 | 0        |
| 106-005    | Kattegat     | 0.796 | 0.998 | 0.796 | 0        |
| 107-001    | Kattegat     | 0.765 | 0.88  | 0.765 | 0        |
| 107103-001 | Kattegat     | 0.786 | 0.998 | 0.786 | 0        |
| 107108-001 | Kattegat     | 0.779 | 0.998 | 0.779 | 0        |
| 108-003    | Kattegat     | 0.491 | 0.279 | 0.491 | 0        |
| 108-004    | Kattegat     | 0.599 | 0.228 | 0.599 | 0        |
| 108-005    | Kattegat     | 0.707 | 0.28  | 0.707 | 0        |
| 108-006    | Kattegat     | 0.706 | 0.28  | 0.706 | 0        |
| 108-007    | Kattegat     | 0.684 | 0.274 | 0.684 | 0        |

|         |          |       |       |       |   |
|---------|----------|-------|-------|-------|---|
| 108-008 | Kattegat | 0.697 | 0.278 | 0.697 | 0 |
| 108-009 | Kattegat | 0.69  | 0.277 | 0.69  | 0 |
| 108-010 | Kattegat | 0.559 | 0.209 | 0.559 | 0 |
| 108-011 | Kattegat | 0.659 | 0.262 | 0.659 | 0 |
| 108-012 | Kattegat | 0.646 | 0.27  | 0.646 | 0 |
| 108-013 | Kattegat | 0.673 | 0.273 | 0.673 | 0 |
| 108-014 | Kattegat | 0.659 | 0.278 | 0.659 | 0 |
| 108-015 | Kattegat | 0.448 | 0.21  | 0.448 | 0 |
| 108-016 | Kattegat | 0.659 | 0.276 | 0.659 | 0 |
| 108-017 | Kattegat | 0.348 | 0.199 | 0.348 | 0 |
| 108-018 | Kattegat | 0.595 | 0.274 | 0.595 | 0 |
| 108-019 | Kattegat | 0.306 | 0.099 | 0.306 | 0 |
| 108-020 | Kattegat | 0.441 | 0.228 | 0.441 | 0 |
| 108-021 | Kattegat | 0.373 | 0.044 | 0.373 | 0 |
| 108-022 | Kattegat | 0.402 | 0.08  | 0.402 | 0 |
| 108-023 | Kattegat | 0.306 | 0.007 | 0.306 | 0 |
| 108-024 | Kattegat | 0.531 | 0.086 | 0.531 | 0 |
| 108-025 | Kattegat | 0.562 | 0.09  | 0.562 | 0 |
| 108-026 | Kattegat | 0.606 | 0.23  | 0.606 | 0 |
| 108-027 | Kattegat | 0.598 | 0.243 | 0.598 | 0 |
| 108-028 | Kattegat | 0.403 | 0.124 | 0.403 | 0 |
| 108-029 | Kattegat | 0.318 | 0.098 | 0.318 | 0 |
| 108-030 | Kattegat | 0.381 | 0.125 | 0.381 | 0 |
| 108-031 | Kattegat | 0.339 | 0.106 | 0.339 | 0 |
| 108-032 | Kattegat | 0.385 | 0.117 | 0.385 | 0 |
| 108-033 | Kattegat | 0.398 | 0.122 | 0.398 | 0 |
| 108-034 | Kattegat | 0.413 | 0.14  | 0.413 | 0 |
| 108-035 | Kattegat | 0.151 | 0.019 | 0.151 | 0 |
| 108-036 | Kattegat | 0.442 | 0.157 | 0.442 | 0 |
| 108-037 | Kattegat | 0.311 | 0.186 | 0.311 | 0 |
| 108-038 | Kattegat | 0.561 | 0.249 | 0.561 | 0 |
| 108-039 | Kattegat | 0.288 | 0.101 | 0.288 | 0 |
| 108-040 | Kattegat | 0.394 | 0.258 | 0.394 | 0 |
| 108-041 | Kattegat | 0.358 | 0.263 | 0.358 | 0 |
| 108-042 | Kattegat | 0.271 | 0.017 | 0.271 | 0 |
| 108-043 | Kattegat | 0.4   | 0.065 | 0.4   | 0 |
| 108-044 | Kattegat | 0.439 | 0.078 | 0.439 | 0 |
| 108-045 | Kattegat | 0.455 | 0.089 | 0.455 | 0 |
| 108-046 | Kattegat | 0.452 | 0.079 | 0.452 | 0 |
| 108-047 | Kattegat | 0.403 | 0.07  | 0.403 | 0 |
| 108-048 | Kattegat | 0.465 | 0.092 | 0.465 | 0 |
| 108-049 | Kattegat | 0.354 | 0.093 | 0.354 | 0 |
| 108-050 | Kattegat | 0.355 | 0.093 | 0.355 | 0 |
| 108-051 | Kattegat | 0.354 | 0.093 | 0.354 | 0 |
| 108-052 | Kattegat | 0.512 | 0.16  | 0.512 | 0 |
| 108-053 | Kattegat | 0.621 | 0.278 | 0.621 | 0 |
| 108-054 | Kattegat | 0.417 | 0.198 | 0.417 | 0 |
| 108-055 | Kattegat | 0.628 | 0.279 | 0.628 | 0 |
| 108-056 | Kattegat | 0.475 | 0.244 | 0.475 | 0 |
| 108-057 | Kattegat | 0.36  | 0.018 | 0.36  | 0 |

|         |          |       |       |       |   |
|---------|----------|-------|-------|-------|---|
| 108-058 | Kattegat | 0.384 | 0.024 | 0.384 | 0 |
| 108-059 | Kattegat | 0.486 | 0.091 | 0.486 | 0 |
| 108-060 | Kattegat | 0.288 | 0.017 | 0.288 | 0 |
| 108-061 | Kattegat | 0.328 | 0.021 | 0.328 | 0 |
| 108-062 | Kattegat | 0.468 | 0.095 | 0.468 | 0 |
| 108-063 | Kattegat | 0.482 | 0.096 | 0.482 | 0 |
| 108-064 | Kattegat | 0.503 | 0.125 | 0.503 | 0 |
| 108-065 | Kattegat | 0.532 | 0.139 | 0.532 | 0 |
| 108-066 | Kattegat | 0.353 | 0.07  | 0.353 | 0 |
| 108-067 | Kattegat | 0.381 | 0.072 | 0.381 | 0 |
| 108-068 | Kattegat | 0.281 | 0.09  | 0.281 | 0 |
| 108-069 | Kattegat | 0.195 | 0.057 | 0.195 | 0 |
| 108-070 | Kattegat | 0.369 | 0.104 | 0.369 | 0 |
| 108-071 | Kattegat | 0.533 | 0.136 | 0.533 | 0 |
| 108-072 | Kattegat | 0.524 | 0.138 | 0.524 | 0 |
| 108-073 | Kattegat | 0.552 | 0.16  | 0.552 | 0 |
| 108-074 | Kattegat | 0.548 | 0.279 | 0.548 | 0 |
| 108-075 | Kattegat | 0.446 | 0.161 | 0.446 | 0 |
| 108-076 | Kattegat | 0.614 | 0.275 | 0.614 | 0 |
| 108-077 | Kattegat | 0.501 | 0.276 | 0.501 | 0 |
| 108-078 | Kattegat | 0.476 | 0.276 | 0.476 | 0 |
| 108-079 | Kattegat | 0.521 | 0.276 | 0.521 | 0 |
| 108-080 | Kattegat | 0.508 | 0.276 | 0.508 | 0 |
| 108-081 | Kattegat | 0.491 | 0.276 | 0.491 | 0 |
| 108-082 | Kattegat | 0.497 | 0.275 | 0.497 | 0 |
| 108-083 | Kattegat | 0.532 | 0.262 | 0.532 | 0 |
| 108-084 | Kattegat | 0.67  | 0.279 | 0.67  | 0 |
| 108-085 | Kattegat | 0.669 | 0.279 | 0.669 | 0 |
| 108-086 | Kattegat | 0.565 | 0.28  | 0.565 | 0 |
| 108-087 | Kattegat | 0.569 | 0.28  | 0.569 | 0 |
| 108-088 | Kattegat | 0.547 | 0.28  | 0.547 | 0 |
| 108-089 | Kattegat | 0.55  | 0.28  | 0.55  | 0 |
| 108-090 | Kattegat | 0.463 | 0.165 | 0.463 | 0 |
| 108-091 | Kattegat | 0.446 | 0.164 | 0.446 | 0 |
| 108-092 | Kattegat | 0.547 | 0.28  | 0.547 | 0 |
| 108-093 | Kattegat | 0.551 | 0.28  | 0.551 | 0 |
| 108-094 | Kattegat | 0.623 | 0.277 | 0.623 | 0 |
| 108-095 | Kattegat | 0.665 | 0.279 | 0.665 | 0 |
| 108-096 | Kattegat | 0.567 | 0.28  | 0.567 | 0 |
| 108-097 | Kattegat | 0.638 | 0.786 | 0.638 | 0 |
| 108-098 | Kattegat | 0.44  | 0.3   | 0.44  | 0 |
| 108-099 | Kattegat | 0.201 | 0.119 | 0.201 | 0 |
| 108-100 | Kattegat | 0.456 | 0.32  | 0.456 | 0 |
| 108-101 | Kattegat | 0.496 | 0.323 | 0.496 | 0 |
| 108-102 | Kattegat | 0.611 | 0.885 | 0.611 | 0 |
| 108-103 | Kattegat | 0.723 | 0.973 | 0.723 | 0 |
| 108-104 | Kattegat | 0.56  | 0.963 | 0.56  | 0 |
| 108-105 | Kattegat | 0.758 | 0.995 | 0.758 | 0 |
| 108-106 | Kattegat | 0.769 | 0.99  | 0.769 | 0 |
| 108-107 | Kattegat | 0.678 | 0.997 | 0.678 | 0 |

|            |               |       |       |       |          |
|------------|---------------|-------|-------|-------|----------|
| 108107-001 | Kattegat      | 0.771 | 0.999 | 0.771 | 0        |
| 108109-001 | Skagerrak     | 0.804 | 0.996 | 0.804 | 7.197096 |
| 109-001    | Skagerrak     | 0.769 | 0.648 | 0.769 | 4.682448 |
| 109108-001 | Skagerrak     | 0.845 | 0.999 | 0.845 | 7.218774 |
| 109110-001 | Skagerrak     | 0.866 | 0.999 | 0.866 | 7.218774 |
| 110-001    | Skagerrak     | 0.75  | 0.558 | 0.75  | 4.032108 |
| 110-002    | Skagerrak     | 0.781 | 0.559 | 0.781 | 4.039334 |
| 110-003    | Skagerrak     | 0.787 | 0.561 | 0.787 | 4.053786 |
| 110-004    | Skagerrak     | 0.775 | 0.951 | 0.775 | 6.871926 |
| 110-005    | Skagerrak     | 0.775 | 0.992 | 0.775 | 7.168192 |
| 11-001     | Bothnian Bay  | 0.812 | 0.973 | 0.812 | 7.030898 |
| 110109-001 | Skagerrak     | 0.848 | 1,000 | 0.848 | 7.226    |
| 110111-001 | Skagerrak     | 0.869 | 0.999 | 0.869 | 7.218774 |
| 111-001    | Skagerrak     | 0.777 | 0.782 | 0.777 | 5.650732 |
| 111110-001 | Skagerrak     | 0.845 | 1,000 | 0.845 | 7.226    |
| 111112-001 | Skagerrak     | 0.817 | 0.997 | 0.817 | 7.204322 |
| 112-001    | Skagerrak     | 0.508 | 0.475 | 0.508 | 3.43235  |
| 112-002    | Skagerrak     | 0.756 | 0.474 | 0.756 | 3.425124 |
| 112-003    | Skagerrak     | 0.494 | 0.996 | 0.494 | 7.197096 |
| 112111-001 | Skagerrak     | 0.444 | 0.998 | 0.444 | 7.211548 |
| 117-001    | Baltic Proper | 0.857 | 0.999 | 0.857 | 7.218774 |
| 117-002    | Baltic Proper | 0.849 | 0.999 | 0.849 | 7.218774 |
| 118000-001 | Baltic Proper | 0.779 | 0.924 | 0.779 | 6.676824 |
| 118-001    | Baltic Proper | 0.857 | 0.997 | 0.857 | 7.204322 |
| 118118-001 | Baltic Proper | 0.833 | 0.958 | 0.833 | 6.922508 |
| 119000-001 | Baltic Proper | 0.803 | 1,000 | 0.803 | 7.226    |
| 119119-001 | Baltic Proper | 0.81  | 0.995 | 0.81  | 7.18987  |
| 12-001     | Bothnian Bay  | 0.807 | 0.99  | 0.807 | 7.15374  |
| 13-006     | Bothnian Bay  | 0.719 | 0.883 | 0.719 | 6.380558 |
| 13-008     | Bothnian Bay  | 0.468 | 0.4   | 0.468 | 2.8904   |
| 13-009     | Bothnian Bay  | 0.635 | 0.796 | 0.635 | 5.751896 |
| 13-010     | Bothnian Bay  | 0.37  | 0.985 | 0.37  | 7.11761  |
| 13-011     | Bothnian Bay  | 0.577 | 0.993 | 0.577 | 7.175418 |
| 13-014     | Bothnian Bay  | 0.503 | 0.863 | 0.503 | 6.236038 |
| 13-015     | Bothnian Bay  | 0.618 | 0.958 | 0.618 | 6.922508 |
| 13-016     | Bothnian Bay  | 0.686 | 0.996 | 0.686 | 7.197096 |
| 13-017     | Bothnian Bay  | 0.732 | 0.997 | 0.732 | 7.204322 |
| 13-018     | Bothnian Bay  | 0.707 | 1,000 | 0.707 | 7.226    |
| 14-001     | Bothnian Bay  | 0.748 | 0.988 | 0.748 | 7.139288 |
| 15-001     | Bothnian Bay  | 0.82  | 0.995 | 0.82  | 7.18987  |
| 16-001     | Bothnian Bay  | 0.803 | 0.982 | 0.803 | 7.095932 |
| 17-001     | Bothnian Bay  | 0.738 | 0.905 | 0.738 | 6.53953  |
| 17-003     | Bothnian Bay  | 0.832 | 0.998 | 0.832 | 7.211548 |
| 18-001     | Bothnian Bay  | 0.764 | 0.801 | 0.764 | 5.788026 |
| 18-002     | Bothnian Bay  | 0.838 | 0.981 | 0.838 | 7.088706 |
| 18-003     | Bothnian Bay  | 0.848 | 0.996 | 0.848 | 7.197096 |
| 18-004     | Bothnian Bay  | 0.844 | 0.998 | 0.844 | 7.211548 |
| 18-005     | Bothnian Bay  | 0.828 | 0.996 | 0.828 | 7.197096 |
| 19-001     | Bothnian Bay  | 0.809 | 0.995 | 0.809 | 7.18987  |
| 19-002     | Bothnian Bay  | 0.832 | 1,000 | 0.832 | 7.226    |

|        |              |       |       |       |          |
|--------|--------------|-------|-------|-------|----------|
| 20-005 | Bothnian Bay | 0.459 | 0.567 | 0.459 | 4.097142 |
| 20-006 | Bothnian Bay | 0.563 | 0.668 | 0.563 | 4.826968 |
| 20-007 | Bothnian Bay | 0.679 | 0.812 | 0.679 | 5.867512 |
| 20-008 | Bothnian Bay | 0.758 | 0.945 | 0.758 | 6.82857  |
| 20-009 | Bothnian Bay | 0.384 | 0.99  | 0.384 | 7.15374  |
| 2-001  | Bothnian Bay | 0.831 | 0.994 | 0.831 | 7.182644 |
| 20-010 | Bothnian Bay | 0.422 | 0.992 | 0.422 | 7.168192 |
| 20-011 | Bothnian Bay | 0.383 | 0.92  | 0.383 | 6.64792  |
| 20-012 | Bothnian Bay | 0.403 | 0.98  | 0.403 | 7.08148  |
| 20-013 | Bothnian Bay | 0.429 | 0.994 | 0.429 | 7.182644 |
| 20-014 | Bothnian Bay | 0.551 | 0.988 | 0.551 | 7.139288 |
| 20-015 | Bothnian Bay | 0.49  | 0.995 | 0.49  | 7.18987  |
| 20-016 | Bothnian Bay | 0.464 | 0.998 | 0.464 | 7.211548 |
| 20-017 | Bothnian Bay | 0.569 | 0.999 | 0.569 | 7.218774 |
| 20-018 | Bothnian Bay | 0.581 | 1,000 | 0.581 | 7.226    |
| 21-001 | Bothnian Bay | 0.718 | 0.864 | 0.718 | 6.243264 |
| 21-002 | Bothnian Bay | 0.797 | 0.966 | 0.797 | 6.980316 |
| 22-001 | Bothnian Bay | 0.67  | 0.86  | 0.67  | 6.21436  |
| 23-001 | Bothnian Bay | 0.841 | 0.999 | 0.841 | 7.218774 |
| 24-001 | Bothnian Bay | 0.727 | 0.885 | 0.727 | 6.39501  |
| 24-002 | Bothnian Bay | 0.668 | 0.777 | 0.668 | 5.614602 |
| 24-003 | Bothnian Bay | 0.771 | 0.929 | 0.771 | 6.712954 |
| 24-004 | Bothnian Bay | 0.838 | 0.996 | 0.838 | 7.197096 |
| 24-005 | Bothnian Bay | 0.85  | 1,000 | 0.85  | 7.226    |
| 25-001 | Bothnian Bay | 0.838 | 0.992 | 0.838 | 7.168192 |
| 25-002 | Bothnian Bay | 0.843 | 1,000 | 0.843 | 7.226    |
| 26-001 | Bothnian Sea | 0.73  | 0.933 | 0.73  | 6.741858 |
| 26-002 | Bothnian Sea | 0.834 | 0.997 | 0.834 | 7.204322 |
| 27-001 | Bothnian Sea | 0.804 | 0.968 | 0.804 | 6.994768 |
| 28-001 | Bothnian Sea | 0.272 | 0.619 | 0.272 | 4.472894 |
| 28-004 | Bothnian Sea | 0.393 | 0.724 | 0.393 | 5.231624 |
| 28-005 | Bothnian Sea | 0.475 | 0.758 | 0.475 | 5.477308 |
| 28-007 | Bothnian Sea | 0.481 | 0.76  | 0.481 | 5.49176  |
| 28-008 | Bothnian Sea | 0.471 | 0.76  | 0.471 | 5.49176  |
| 28-015 | Bothnian Sea | 0.38  | 0.631 | 0.38  | 4.559606 |
| 28-016 | Bothnian Sea | 0.159 | 0.781 | 0.159 | 5.643506 |
| 28-017 | Bothnian Sea | 0.33  | 0.801 | 0.33  | 5.788026 |
| 28-018 | Bothnian Sea | 0.38  | 0.981 | 0.38  | 7.088706 |
| 28-019 | Bothnian Sea | 0.715 | 0.986 | 0.715 | 7.124836 |
| 28-020 | Bothnian Sea | 0.287 | 0.692 | 0.287 | 5.000392 |
| 28-022 | Bothnian Sea | 0.261 | 0.923 | 0.261 | 6.669598 |
| 28-023 | Bothnian Sea | 0.376 | 0.797 | 0.376 | 5.759122 |
| 28-024 | Bothnian Sea | 0.716 | 0.985 | 0.716 | 7.11761  |
| 28-025 | Bothnian Sea | 0.72  | 0.999 | 0.72  | 7.218774 |
| 28-026 | Bothnian Sea | 0.709 | 0.997 | 0.709 | 7.204322 |
| 28-027 | Bothnian Sea | 0.482 | 0.987 | 0.482 | 7.132062 |
| 28-028 | Bothnian Sea | 0.713 | 0.999 | 0.713 | 7.218774 |
| 28-029 | Bothnian Sea | 0.553 | 0.999 | 0.553 | 7.218774 |
| 28-030 | Bothnian Sea | 0.757 | 0.999 | 0.757 | 7.218774 |
| 28-031 | Bothnian Sea | 0.811 | 0.999 | 0.811 | 7.218774 |

|        |              |       |       |       |          |
|--------|--------------|-------|-------|-------|----------|
| 28-032 | Bothnian Sea | 0.589 | 0.864 | 0.589 | 6.243264 |
| 28-033 | Bothnian Sea | 0.601 | 0.914 | 0.601 | 6.604564 |
| 28-034 | Bothnian Sea | 0.584 | 0.919 | 0.584 | 6.640694 |
| 28-035 | Bothnian Sea | 0.612 | 0.926 | 0.612 | 6.691276 |
| 28-036 | Bothnian Sea | 0.373 | 0.93  | 0.373 | 6.72018  |
| 28-039 | Bothnian Sea | 0.683 | 0.989 | 0.683 | 7.146514 |
| 28-040 | Bothnian Sea | 0.719 | 0.993 | 0.719 | 7.175418 |
| 28-041 | Bothnian Sea | 0.605 | 0.98  | 0.605 | 7.08148  |
| 28-042 | Bothnian Sea | 0.725 | 0.998 | 0.725 | 7.211548 |
| 28-043 | Bothnian Sea | 0.704 | 1,000 | 0.704 | 7.226    |
| 28-044 | Bothnian Sea | 0.414 | 0.869 | 0.414 | 6.279394 |
| 28-045 | Bothnian Sea | 0.693 | 0.999 | 0.693 | 7.218774 |
| 28-046 | Bothnian Sea | 0.464 | 0.997 | 0.464 | 7.204322 |
| 28-047 | Bothnian Sea | 0.7   | 1,000 | 0.7   | 7.226    |
| 28-048 | Bothnian Sea | 0.708 | 1,000 | 0.708 | 7.226    |
| 28-049 | Bothnian Sea | 0.807 | 0.997 | 0.807 | 7.204322 |
| 28-050 | Bothnian Sea | 0.82  | 0.997 | 0.82  | 7.204322 |
| 28-051 | Bothnian Sea | 0.831 | 0.993 | 0.831 | 7.175418 |
| 29-001 | Bothnian Sea | 0.816 | 0.998 | 0.816 | 7.211548 |
| 30-001 | Bothnian Sea | 0.688 | 0.999 | 0.688 | 7.218774 |
| 30-002 | Bothnian Sea | 0.726 | 0.996 | 0.726 | 7.197096 |
| 30-003 | Bothnian Sea | 0.841 | 0.997 | 0.841 | 7.204322 |
| 30-004 | Bothnian Sea | 0.851 | 0.997 | 0.851 | 7.204322 |
| 3-001  | Bothnian Bay | 0.776 | 0.989 | 0.776 | 7.146514 |
| 3-002  | Bothnian Bay | 0.826 | 0.989 | 0.826 | 7.146514 |
| 31-001 | Bothnian Sea | 0.772 | 0.987 | 0.772 | 7.132062 |
| 32-001 | Bothnian Sea | 0.677 | 0.996 | 0.677 | 7.197096 |
| 32-002 | Bothnian Sea | 0.671 | 0.997 | 0.671 | 7.204322 |
| 32-003 | Bothnian Sea | 0.78  | 0.997 | 0.78  | 7.204322 |
| 33-001 | Bothnian Sea | 0.708 | 0.849 | 0.708 | 6.134874 |
| 33-002 | Bothnian Sea | 0.863 | 0.987 | 0.863 | 7.132062 |
| 34-001 | Bothnian Sea | 0.612 | 0.775 | 0.612 | 5.60015  |
| 34-002 | Bothnian Sea | 0.596 | 0.782 | 0.596 | 5.650732 |
| 34-003 | Bothnian Sea | 0.622 | 0.96  | 0.622 | 6.93696  |
| 34-004 | Bothnian Sea | 0.57  | 0.587 | 0.57  | 4.241662 |
| 34-005 | Bothnian Sea | 0.625 | 0.975 | 0.625 | 7.04535  |
| 34-006 | Bothnian Sea | 0.666 | 0.985 | 0.666 | 7.11761  |
| 34-007 | Bothnian Sea | 0.703 | 0.985 | 0.703 | 7.11761  |
| 35-001 | Bothnian Sea | 0.848 | 0.987 | 0.848 | 7.132062 |
| 36-001 | Bothnian Sea | 0.816 | 0.91  | 0.816 | 6.57566  |
| 36-002 | Bothnian Sea | 0.832 | 0.906 | 0.832 | 6.546756 |
| 36-003 | Bothnian Sea | 0.86  | 0.913 | 0.86  | 6.597338 |
| 36-004 | Bothnian Sea | 0.842 | 0.912 | 0.842 | 6.590112 |
| 36-005 | Bothnian Sea | 0.87  | 0.913 | 0.87  | 6.597338 |
| 37-001 | Bothnian Sea | 0.81  | 0.968 | 0.81  | 6.994768 |
| 37-002 | Bothnian Sea | 0.842 | 0.97  | 0.842 | 7.00922  |
| 38-002 | Bothnian Sea | 0.479 | 0.701 | 0.479 | 5.065426 |
| 38-003 | Bothnian Sea | 0.391 | 0.788 | 0.391 | 5.694088 |
| 38-004 | Bothnian Sea | 0.384 | 0.644 | 0.384 | 4.653544 |
| 38-005 | Bothnian Sea | 0.426 | 0.659 | 0.426 | 4.761934 |

|        |              |       |       |       |          |
|--------|--------------|-------|-------|-------|----------|
| 38-007 | Bothnian Sea | 0.248 | 0.719 | 0.248 | 5.195494 |
| 38-008 | Bothnian Sea | 0.3   | 0.727 | 0.3   | 5.253302 |
| 38-009 | Bothnian Sea | 0.664 | 0.923 | 0.664 | 6.669598 |
| 38-010 | Bothnian Sea | 0.241 | 0.967 | 0.241 | 6.987542 |
| 38-011 | Bothnian Sea | 0.474 | 0.903 | 0.474 | 6.525078 |
| 38-012 | Bothnian Sea | 0.775 | 0.966 | 0.775 | 6.980316 |
| 38-013 | Bothnian Sea | 0.793 | 0.982 | 0.793 | 7.095932 |
| 38-014 | Bothnian Sea | 0.816 | 0.996 | 0.816 | 7.197096 |
| 38-015 | Bothnian Sea | 0.474 | 0.79  | 0.474 | 5.70854  |
| 38-016 | Bothnian Sea | 0.8   | 0.992 | 0.8   | 7.168192 |
| 38-017 | Bothnian Sea | 0.634 | 0.956 | 0.634 | 6.908056 |
| 38-019 | Bothnian Sea | 0.353 | 0.935 | 0.353 | 6.75631  |
| 38-020 | Bothnian Sea | 0.378 | 0.94  | 0.378 | 6.79244  |
| 38-021 | Bothnian Sea | 0.576 | 0.951 | 0.576 | 6.871926 |
| 38-022 | Bothnian Sea | 0.252 | 0.57  | 0.252 | 4.11882  |
| 38-023 | Bothnian Sea | 0.793 | 0.989 | 0.793 | 7.146514 |
| 38-024 | Bothnian Sea | 0.597 | 0.929 | 0.597 | 6.712954 |
| 38-026 | Bothnian Sea | 0.328 | 0.889 | 0.328 | 6.423914 |
| 38-027 | Bothnian Sea | 0.43  | 0.936 | 0.43  | 6.763536 |
| 38-028 | Bothnian Sea | 0.616 | 0.956 | 0.616 | 6.908056 |
| 38-029 | Bothnian Sea | 0.783 | 0.983 | 0.783 | 7.103158 |
| 38-030 | Bothnian Sea | 0.779 | 0.987 | 0.779 | 7.132062 |
| 38-031 | Bothnian Sea | 0.792 | 0.992 | 0.792 | 7.168192 |
| 38-032 | Bothnian Sea | 0.674 | 0.966 | 0.674 | 6.980316 |
| 38-033 | Bothnian Sea | 0.79  | 0.994 | 0.79  | 7.182644 |
| 38-034 | Bothnian Sea | 0.793 | 0.996 | 0.793 | 7.197096 |
| 38-035 | Bothnian Sea | 0.794 | 0.997 | 0.794 | 7.204322 |
| 38-036 | Bothnian Sea | 0.495 | 0.647 | 0.495 | 4.675222 |
| 38-037 | Bothnian Sea | 0.46  | 0.664 | 0.46  | 4.798064 |
| 38-038 | Bothnian Sea | 0.519 | 0.786 | 0.519 | 5.679636 |
| 38-041 | Bothnian Sea | 0.558 | 0.799 | 0.558 | 5.773574 |
| 38-043 | Bothnian Sea | 0.381 | 0.86  | 0.381 | 6.21436  |
| 38-044 | Bothnian Sea | 0.284 | 0.763 | 0.284 | 5.513438 |
| 38-045 | Bothnian Sea | 0.673 | 0.878 | 0.673 | 6.344428 |
| 38-046 | Bothnian Sea | 0.748 | 0.959 | 0.748 | 6.929734 |
| 38-047 | Bothnian Sea | 0.591 | 0.881 | 0.591 | 6.366106 |
| 38-048 | Bothnian Sea | 0.767 | 0.969 | 0.767 | 7.001994 |
| 38-049 | Bothnian Sea | 0.333 | 0.88  | 0.333 | 6.35888  |
| 38-050 | Bothnian Sea | 0.704 | 0.937 | 0.704 | 6.770762 |
| 38-051 | Bothnian Sea | 0.793 | 0.99  | 0.793 | 7.15374  |
| 38-052 | Bothnian Sea | 0.788 | 0.991 | 0.788 | 7.160966 |
| 38-053 | Bothnian Sea | 0.782 | 0.989 | 0.782 | 7.146514 |
| 38-054 | Bothnian Sea | 0.798 | 0.997 | 0.798 | 7.204322 |
| 39-001 | Bothnian Sea | 0.709 | 0.919 | 0.709 | 6.640694 |
| 40-001 | Bothnian Sea | 0.181 | 0.047 | 0.181 | 0.339622 |
| 40-002 | Bothnian Sea | 0.234 | 0.073 | 0.234 | 0.527498 |
| 40-003 | Bothnian Sea | 0.265 | 0.108 | 0.265 | 0.780408 |
| 40-004 | Bothnian Sea | 0.416 | 0.175 | 0.416 | 1.26455  |
| 40-006 | Bothnian Sea | 0.26  | 0.194 | 0.26  | 1.401844 |
| 40-007 | Bothnian Sea | 0.498 | 0.222 | 0.498 | 1.604172 |

|        |              |       |       |       |          |
|--------|--------------|-------|-------|-------|----------|
| 40-009 | Bothnian Sea | 0.463 | 0.234 | 0.463 | 1.690884 |
| 40-010 | Bothnian Sea | 0.567 | 0.373 | 0.567 | 2.695298 |
| 40-011 | Bothnian Sea | 0.629 | 0.403 | 0.629 | 2.912078 |
| 40-012 | Bothnian Sea | 0.616 | 0.419 | 0.616 | 3.027694 |
| 40-013 | Bothnian Sea | 0.197 | 0.322 | 0.197 | 2.326772 |
| 40-015 | Bothnian Sea | 0.437 | 0.243 | 0.437 | 1.755918 |
| 40-016 | Bothnian Sea | 0.57  | 0.401 | 0.57  | 2.897626 |
| 40-017 | Bothnian Sea | 0.639 | 0.425 | 0.639 | 3.07105  |
| 40-018 | Bothnian Sea | 0.246 | 0.107 | 0.246 | 0.773182 |
| 40-019 | Bothnian Sea | 0.526 | 0.25  | 0.526 | 1.8065   |
| 40-020 | Bothnian Sea | 0.191 | 0.189 | 0.191 | 1.365714 |
| 40-021 | Bothnian Sea | 0.656 | 0.426 | 0.656 | 3.078276 |
| 40-022 | Bothnian Sea | 0.67  | 0.963 | 0.67  | 6.958638 |
| 40-023 | Bothnian Sea | 0.679 | 0.963 | 0.679 | 6.958638 |
| 40-031 | Bothnian Sea | 0.667 | 0.445 | 0.667 | 3.21557  |
| 40-032 | Bothnian Sea | 0.652 | 0.455 | 0.652 | 3.28783  |
| 40-033 | Bothnian Sea | 0.722 | 0.46  | 0.722 | 3.32396  |
| 40-034 | Bothnian Sea | 0.771 | 0.959 | 0.771 | 6.929734 |
| 40-035 | Bothnian Sea | 0.474 | 0.503 | 0.474 | 3.634678 |
| 40-039 | Bothnian Sea | 0.651 | 0.682 | 0.651 | 4.928132 |
| 40-040 | Bothnian Sea | 0.446 | 0.145 | 0.446 | 1.04777  |
| 40-042 | Bothnian Sea | 0.683 | 0.708 | 0.683 | 5.116008 |
| 40-043 | Bothnian Sea | 0.731 | 0.904 | 0.731 | 6.532304 |
| 40-044 | Bothnian Sea | 0.794 | 0.927 | 0.794 | 6.698502 |
| 40-045 | Bothnian Sea | 0.817 | 0.96  | 0.817 | 6.93696  |
| 40-046 | Bothnian Sea | 0.641 | 0.965 | 0.641 | 6.97309  |
| 40-047 | Bothnian Sea | 0.672 | 0.967 | 0.672 | 6.987542 |
| 40-048 | Bothnian Sea | 0.642 | 0.979 | 0.642 | 7.074254 |
| 40-049 | Bothnian Sea | 0.654 | 0.642 | 0.654 | 4.639092 |
| 4-005  | Bothnian Bay | 0.733 | 0.974 | 0.733 | 7.038124 |
| 40-050 | Bothnian Sea | 0.687 | 0.729 | 0.687 | 5.267754 |
| 40-051 | Bothnian Sea | 0.709 | 0.797 | 0.709 | 5.759122 |
| 40-052 | Bothnian Sea | 0.741 | 0.799 | 0.741 | 5.773574 |
| 40-053 | Bothnian Sea | 0.63  | 0.996 | 0.63  | 7.197096 |
| 40-054 | Bothnian Sea | 0.691 | 0.996 | 0.691 | 7.197096 |
| 40-055 | Bothnian Sea | 0.662 | 0.996 | 0.662 | 7.197096 |
| 40-056 | Bothnian Sea | 0.38  | 0.355 | 0.38  | 2.56523  |
| 40-057 | Bothnian Sea | 0.629 | 0.998 | 0.629 | 7.211548 |
| 40-058 | Bothnian Sea | 0.569 | 1,000 | 0.569 | 7.226    |
| 40-059 | Bothnian Sea | 0.676 | 1,000 | 0.676 | 7.226    |
| 4-007  | Bothnian Bay | 0.727 | 0.984 | 0.727 | 7.110384 |
| 4-008  | Bothnian Bay | 0.61  | 0.992 | 0.61  | 7.168192 |
| 4-009  | Bothnian Bay | 0.603 | 0.992 | 0.603 | 7.168192 |
| 4-011  | Bothnian Bay | 0.589 | 0.993 | 0.589 | 7.175418 |
| 4-012  | Bothnian Bay | 0.579 | 0.993 | 0.579 | 7.175418 |
| 4-013  | Bothnian Bay | 0.586 | 0.993 | 0.586 | 7.175418 |
| 4-014  | Bothnian Bay | 0.651 | 0.989 | 0.651 | 7.146514 |
| 4-015  | Bothnian Bay | 0.827 | 0.988 | 0.827 | 7.139288 |
| 4-016  | Bothnian Bay | 0.791 | 0.989 | 0.791 | 7.146514 |
| 4-017  | Bothnian Bay | 0.809 | 0.99  | 0.809 | 7.15374  |

|        |              |       |       |       |          |
|--------|--------------|-------|-------|-------|----------|
| 4-018  | Bothnian Bay | 0.79  | 0.99  | 0.79  | 7.15374  |
| 4-019  | Bothnian Bay | 0.804 | 0.987 | 0.804 | 7.132062 |
| 4-020  | Bothnian Bay | 0.811 | 0.986 | 0.811 | 7.124836 |
| 4-021  | Bothnian Bay | 0.603 | 0.993 | 0.603 | 7.175418 |
| 4-022  | Bothnian Bay | 0.65  | 0.99  | 0.65  | 7.15374  |
| 4-023  | Bothnian Bay | 0.628 | 0.989 | 0.628 | 7.146514 |
| 4-024  | Bothnian Bay | 0.762 | 0.988 | 0.762 | 7.139288 |
| 4-026  | Bothnian Bay | 0.797 | 0.991 | 0.797 | 7.160966 |
| 4-027  | Bothnian Bay | 0.63  | 0.99  | 0.63  | 7.15374  |
| 4-028  | Bothnian Bay | 0.622 | 0.99  | 0.622 | 7.15374  |
| 4-029  | Bothnian Bay | 0.815 | 0.986 | 0.815 | 7.124836 |
| 4-030  | Bothnian Bay | 0.601 | 0.923 | 0.601 | 6.669598 |
| 4-031  | Bothnian Bay | 0.591 | 0.993 | 0.591 | 7.175418 |
| 4-032  | Bothnian Bay | 0.643 | 0.989 | 0.643 | 7.146514 |
| 4-033  | Bothnian Bay | 0.801 | 0.986 | 0.801 | 7.124836 |
| 4-034  | Bothnian Bay | 0.801 | 0.98  | 0.801 | 7.08148  |
| 4-035  | Bothnian Bay | 0.818 | 0.987 | 0.818 | 7.132062 |
| 4-036  | Bothnian Bay | 0.823 | 0.993 | 0.823 | 7.175418 |
| 4-037  | Bothnian Bay | 0.82  | 0.994 | 0.82  | 7.182644 |
| 41-001 | Bothnian Sea | 0.873 | 0.952 | 0.873 | 6.879152 |
| 42-002 | Bothnian Sea | 0.245 | 0.302 | 0.245 | 2.182252 |
| 42-004 | Bothnian Sea | 0.388 | 0.57  | 0.388 | 4.11882  |
| 42-006 | Bothnian Sea | 0.35  | 0.538 | 0.35  | 3.887588 |
| 42-007 | Bothnian Sea | 0.314 | 0.569 | 0.314 | 4.111594 |
| 42-008 | Bothnian Sea | 0.366 | 0.569 | 0.366 | 4.111594 |
| 42-009 | Bothnian Sea | 0.402 | 0.628 | 0.402 | 4.537928 |
| 42-010 | Bothnian Sea | 0.441 | 0.66  | 0.441 | 4.76916  |
| 42-011 | Bothnian Sea | 0.495 | 0.687 | 0.495 | 4.964262 |
| 42-012 | Bothnian Sea | 0.513 | 0.709 | 0.513 | 5.123234 |
| 42-013 | Bothnian Sea | 0.593 | 0.814 | 0.593 | 5.881964 |
| 42-014 | Bothnian Sea | 0.69  | 0.943 | 0.69  | 6.814118 |
| 42-015 | Bothnian Sea | 0.757 | 0.952 | 0.757 | 6.879152 |
| 42-016 | Bothnian Sea | 0.778 | 0.967 | 0.778 | 6.987542 |
| 42-017 | Bothnian Sea | 0.161 | 0.035 | 0.161 | 0.25291  |
| 42-018 | Bothnian Sea | 0.271 | 0.115 | 0.271 | 0.83099  |
| 42-019 | Bothnian Sea | 0.455 | 0.467 | 0.455 | 3.374542 |
| 42-020 | Bothnian Sea | 0.518 | 0.567 | 0.518 | 4.097142 |
| 42-021 | Bothnian Sea | 0.377 | 0.31  | 0.377 | 2.24006  |
| 42-022 | Bothnian Sea | 0.553 | 0.598 | 0.553 | 4.321148 |
| 42-023 | Bothnian Sea | 0.64  | 0.791 | 0.64  | 5.715766 |
| 42-024 | Bothnian Sea | 0.752 | 0.968 | 0.752 | 6.994768 |
| 42-025 | Bothnian Sea | 0.753 | 0.961 | 0.753 | 6.944186 |
| 42-026 | Bothnian Sea | 0.767 | 0.978 | 0.767 | 7.067028 |
| 42-027 | Bothnian Sea | 0.784 | 0.985 | 0.784 | 7.11761  |
| 43-001 | Bothnian Sea | 0.859 | 0.968 | 0.859 | 6.994768 |
| 44-001 | Bothnian Sea | 0.792 | 0.929 | 0.792 | 6.712954 |
| 44-002 | Bothnian Sea | 0.809 | 0.926 | 0.809 | 6.691276 |
| 44-003 | Bothnian Sea | 0.823 | 0.946 | 0.823 | 6.835796 |
| 44-004 | Bothnian Sea | 0.854 | 0.99  | 0.854 | 7.15374  |
| 45-001 | Bothnian Sea | 0.21  | 0.066 | 0.21  | 0.476916 |

|        |              |       |       |       |          |
|--------|--------------|-------|-------|-------|----------|
| 45-002 | Bothnian Sea | 0.313 | 0.098 | 0.313 | 0.708148 |
| 45-003 | Bothnian Sea | 0.314 | 0.098 | 0.314 | 0.708148 |
| 45-004 | Bothnian Sea | 0.519 | 0.442 | 0.519 | 3.193892 |
| 45-005 | Bothnian Sea | 0.513 | 0.441 | 0.513 | 3.186666 |
| 45-006 | Bothnian Sea | 0.644 | 0.897 | 0.644 | 6.481722 |
| 46-001 | Bothnian Sea | 0.721 | 0.595 | 0.721 | 4.29947  |
| 47-001 | Bothnian Sea | 0.791 | 0.974 | 0.791 | 7.038124 |
| 47-002 | Bothnian Sea | 0.855 | 0.992 | 0.855 | 7.168192 |
| 48-002 | Bothnian Sea | 0.424 | 0.652 | 0.424 | 4.711352 |
| 48-003 | Bothnian Sea | 0.423 | 0.576 | 0.423 | 4.162176 |
| 48-004 | Bothnian Sea | 0.602 | 0.702 | 0.602 | 5.072652 |
| 48-005 | Bothnian Sea | 0.419 | 0.702 | 0.419 | 5.072652 |
| 48-006 | Bothnian Sea | 0.494 | 0.778 | 0.494 | 5.621828 |
| 48-007 | Bothnian Sea | 0.576 | 0.771 | 0.576 | 5.571246 |
| 48-008 | Bothnian Sea | 0.506 | 0.78  | 0.506 | 5.63628  |
| 48-009 | Bothnian Sea | 0.636 | 0.777 | 0.636 | 5.614602 |
| 48-010 | Bothnian Sea | 0.583 | 0.781 | 0.583 | 5.643506 |
| 48-011 | Bothnian Sea | 0.507 | 0.635 | 0.507 | 4.58851  |
| 48-012 | Bothnian Sea | 0.625 | 0.804 | 0.625 | 5.809704 |
| 48-014 | Bothnian Sea | 0.574 | 0.79  | 0.574 | 5.70854  |
| 48-015 | Bothnian Sea | 0.676 | 0.793 | 0.676 | 5.730218 |
| 48-016 | Bothnian Sea | 0.566 | 0.791 | 0.566 | 5.715766 |
| 48-017 | Bothnian Sea | 0.609 | 0.776 | 0.609 | 5.607376 |
| 48-018 | Bothnian Sea | 0.702 | 0.78  | 0.702 | 5.63628  |
| 48-019 | Bothnian Sea | 0.625 | 0.779 | 0.625 | 5.629054 |
| 48-020 | Bothnian Sea | 0.567 | 0.804 | 0.567 | 5.809704 |
| 48-023 | Bothnian Sea | 0.771 | 0.908 | 0.771 | 6.561208 |
| 48-024 | Bothnian Sea | 0.657 | 0.891 | 0.657 | 6.438366 |
| 48-025 | Bothnian Sea | 0.762 | 0.893 | 0.762 | 6.452818 |
| 48-026 | Bothnian Sea | 0.39  | 0.439 | 0.39  | 3.172214 |
| 48-028 | Bothnian Sea | 0.773 | 0.912 | 0.773 | 6.590112 |
| 48-029 | Bothnian Sea | 0.605 | 0.687 | 0.605 | 4.964262 |
| 48-030 | Bothnian Sea | 0.72  | 0.812 | 0.72  | 5.867512 |
| 48-032 | Bothnian Sea | 0.366 | 0.385 | 0.366 | 2.78201  |
| 48-033 | Bothnian Sea | 0.543 | 0.653 | 0.543 | 4.718578 |
| 48-034 | Bothnian Sea | 0.774 | 0.915 | 0.774 | 6.61179  |
| 48-035 | Bothnian Sea | 0.757 | 0.907 | 0.757 | 6.553982 |
| 48-036 | Bothnian Sea | 0.764 | 0.907 | 0.764 | 6.553982 |
| 48-037 | Bothnian Sea | 0.794 | 0.946 | 0.794 | 6.835796 |
| 48-038 | Bothnian Sea | 0.483 | 0.595 | 0.483 | 4.29947  |
| 48-039 | Bothnian Sea | 0.262 | 0.303 | 0.262 | 2.189478 |
| 48-040 | Bothnian Sea | 0.621 | 0.806 | 0.621 | 5.824156 |
| 48-041 | Bothnian Sea | 0.75  | 0.882 | 0.75  | 6.373332 |
| 48-043 | Bothnian Sea | 0.652 | 0.652 | 0.652 | 4.711352 |
| 48-044 | Bothnian Sea | 0.198 | 0.232 | 0.198 | 1.676432 |
| 48-045 | Bothnian Sea | 0.444 | 0.68  | 0.444 | 4.91368  |
| 48-048 | Bothnian Sea | 0.76  | 0.903 | 0.76  | 6.525078 |
| 48-049 | Bothnian Sea | 0.111 | 0.453 | 0.111 | 3.273378 |
| 48-050 | Bothnian Sea | 0.531 | 0.792 | 0.531 | 5.722992 |
| 48-051 | Bothnian Sea | 0.6   | 0.89  | 0.6   | 6.43114  |

|        |              |       |       |       |          |
|--------|--------------|-------|-------|-------|----------|
| 48-052 | Bothnian Sea | 0.445 | 0.72  | 0.445 | 5.20272  |
| 48-053 | Bothnian Sea | 0.628 | 0.895 | 0.628 | 6.46727  |
| 48-054 | Bothnian Sea | 0.352 | 0.665 | 0.352 | 4.80529  |
| 48-055 | Bothnian Sea | 0.64  | 0.904 | 0.64  | 6.532304 |
| 48-056 | Bothnian Sea | 0.578 | 0.893 | 0.578 | 6.452818 |
| 49-001 | Bothnian Sea | 0.666 | 0.811 | 0.666 | 5.860286 |
| 50-001 | Bothnian Sea | 0.466 | 0.267 | 0.466 | 1.929342 |
| 50-002 | Bothnian Sea | 0.454 | 0.265 | 0.454 | 1.91489  |
| 50-003 | Bothnian Sea | 0.865 | 0.997 | 0.865 | 7.204322 |
| 5-001  | Bothnian Bay | 0.825 | 0.997 | 0.825 | 7.204322 |
| 51-001 | Bothnian Sea | 0.695 | 0.565 | 0.695 | 4.08269  |
| 51-002 | Bothnian Sea | 0.775 | 0.813 | 0.775 | 5.874738 |
| 51-003 | Bothnian Sea | 0.765 | 0.825 | 0.765 | 5.96145  |
| 51-004 | Bothnian Sea | 0.869 | 0.999 | 0.869 | 7.218774 |
| 52-001 | Bothnian Sea | 0.547 | 0.836 | 0.547 | 6.040936 |
| 52-002 | Bothnian Sea | 0.616 | 0.834 | 0.616 | 6.026484 |
| 52-003 | Bothnian Sea | 0.604 | 0.826 | 0.604 | 5.968676 |
| 52-004 | Bothnian Sea | 0.581 | 0.812 | 0.581 | 5.867512 |
| 52-005 | Bothnian Sea | 0.288 | 0.431 | 0.288 | 3.114406 |
| 52-006 | Bothnian Sea | 0.516 | 0.747 | 0.516 | 5.397822 |
| 52-007 | Bothnian Sea | 0.612 | 0.833 | 0.612 | 6.019258 |
| 52-008 | Bothnian Sea | 0.866 | 0.996 | 0.866 | 7.197096 |
| 52-009 | Bothnian Sea | 0.867 | 0.996 | 0.867 | 7.197096 |
| 53-001 | Bothnian Sea | 0.754 | 0.962 | 0.754 | 6.951412 |
| 53-002 | Bothnian Sea | 0.714 | 0.964 | 0.714 | 6.965864 |
| 53-003 | Bothnian Sea | 0.387 | 0.472 | 0.387 | 3.410672 |
| 53-004 | Bothnian Sea | 0.803 | 0.968 | 0.803 | 6.994768 |
| 53-005 | Bothnian Sea | 0.797 | 0.965 | 0.797 | 6.97309  |
| 53-006 | Bothnian Sea | 0.745 | 0.965 | 0.745 | 6.97309  |
| 53-007 | Bothnian Sea | 0.724 | 0.965 | 0.724 | 6.97309  |
| 53-008 | Bothnian Sea | 0.436 | 0.734 | 0.436 | 5.303884 |
| 53-009 | Bothnian Sea | 0.595 | 0.863 | 0.595 | 6.236038 |
| 53-010 | Bothnian Sea | 0.548 | 0.871 | 0.548 | 6.293846 |
| 53-011 | Bothnian Sea | 0.64  | 0.959 | 0.64  | 6.929734 |
| 53-012 | Bothnian Sea | 0.639 | 0.96  | 0.639 | 6.93696  |
| 53-013 | Bothnian Sea | 0.692 | 0.967 | 0.692 | 6.987542 |
| 53-016 | Bothnian Sea | 0.716 | 0.969 | 0.716 | 7.001994 |
| 53-017 | Bothnian Sea | 0.678 | 0.967 | 0.678 | 6.987542 |
| 53-018 | Bothnian Sea | 0.735 | 0.969 | 0.735 | 7.001994 |
| 53-019 | Bothnian Sea | 0.524 | 0.604 | 0.524 | 4.364504 |
| 53-021 | Bothnian Sea | 0.539 | 0.593 | 0.539 | 4.285018 |
| 53-022 | Bothnian Sea | 0.552 | 0.603 | 0.552 | 4.357278 |
| 53-023 | Bothnian Sea | 0.561 | 0.604 | 0.561 | 4.364504 |
| 53-024 | Bothnian Sea | 0.604 | 0.609 | 0.604 | 4.400634 |
| 53-025 | Bothnian Sea | 0.555 | 0.615 | 0.555 | 4.44399  |
| 53-026 | Bothnian Sea | 0.596 | 0.614 | 0.596 | 4.436764 |
| 53-027 | Bothnian Sea | 0.603 | 0.615 | 0.603 | 4.44399  |
| 53-028 | Bothnian Sea | 0.654 | 0.608 | 0.654 | 4.393408 |
| 53-029 | Bothnian Sea | 0.663 | 0.61  | 0.663 | 4.40786  |
| 53-030 | Bothnian Sea | 0.531 | 0.531 | 0.531 | 3.837006 |

|        |               |       |       |       |          |
|--------|---------------|-------|-------|-------|----------|
| 53-031 | Bothnian Sea  | 0.641 | 0.61  | 0.641 | 4.40786  |
| 53-032 | Bothnian Sea  | 0.664 | 0.606 | 0.664 | 4.378956 |
| 53-033 | Bothnian Sea  | 0.333 | 0.473 | 0.333 | 3.417898 |
| 53-034 | Bothnian Sea  | 0.4   | 0.472 | 0.4   | 3.410672 |
| 53-035 | Bothnian Sea  | 0.468 | 0.467 | 0.468 | 3.374542 |
| 53-036 | Bothnian Sea  | 0.583 | 0.509 | 0.583 | 3.678034 |
| 53-037 | Bothnian Sea  | 0.558 | 0.499 | 0.558 | 3.605774 |
| 53-038 | Bothnian Sea  | 0.637 | 0.612 | 0.637 | 4.422312 |
| 53-039 | Bothnian Sea  | 0.659 | 0.613 | 0.659 | 4.429538 |
| 53-040 | Bothnian Sea  | 0.808 | 0.95  | 0.808 | 6.8647   |
| 53-041 | Bothnian Sea  | 0.829 | 0.961 | 0.829 | 6.944186 |
| 53-043 | Bothnian Sea  | 0.689 | 0.758 | 0.689 | 5.477308 |
| 53-044 | Bothnian Sea  | 0.165 | 0.137 | 0.165 | 0.989962 |
| 53-045 | Bothnian Sea  | 0.404 | 0.618 | 0.404 | 4.465668 |
| 53-046 | Bothnian Sea  | 0.489 | 0.692 | 0.489 | 5.000392 |
| 53-047 | Bothnian Sea  | 0.508 | 0.71  | 0.508 | 5.13046  |
| 53-048 | Bothnian Sea  | 0.302 | 0.45  | 0.302 | 3.2517   |
| 53-049 | Bothnian Sea  | 0.427 | 0.546 | 0.427 | 3.945396 |
| 53-050 | Bothnian Sea  | 0.466 | 0.666 | 0.466 | 4.812516 |
| 53-051 | Bothnian Sea  | 0.804 | 0.952 | 0.804 | 6.879152 |
| 53-052 | Bothnian Sea  | 0.79  | 0.94  | 0.79  | 6.79244  |
| 53-053 | Bothnian Sea  | 0.579 | 0.647 | 0.579 | 4.675222 |
| 53-054 | Bothnian Sea  | 0.372 | 0.718 | 0.372 | 5.188268 |
| 53-055 | Bothnian Sea  | 0.608 | 0.722 | 0.608 | 5.217172 |
| 53-056 | Bothnian Sea  | 0.812 | 0.956 | 0.812 | 6.908056 |
| 53-057 | Bothnian Sea  | 0.42  | 0.324 | 0.42  | 2.341224 |
| 53-058 | Bothnian Sea  | 0.639 | 0.691 | 0.639 | 4.993166 |
| 53-059 | Bothnian Sea  | 0.809 | 0.952 | 0.809 | 6.879152 |
| 53-060 | Bothnian Sea  | 0.711 | 0.887 | 0.711 | 6.409462 |
| 53-061 | Bothnian Sea  | 0.781 | 0.944 | 0.781 | 6.821344 |
| 53-062 | Bothnian Sea  | 0.853 | 0.975 | 0.853 | 7.04535  |
| 53-063 | Bothnian Sea  | 0.739 | 0.881 | 0.739 | 6.366106 |
| 53-064 | Bothnian Sea  | 0.806 | 0.987 | 0.806 | 7.132062 |
| 54-001 | Bothnian Sea  | 0.593 | 0.516 | 0.593 | 3.728616 |
| 54-002 | Bothnian Sea  | 0.83  | 1,000 | 0.83  | 7.226    |
| 55-001 | Bothnian Sea  | 0.584 | 0.796 | 0.584 | 5.751896 |
| 55-002 | Bothnian Sea  | 0.697 | 0.877 | 0.697 | 6.337202 |
| 55-003 | Bothnian Sea  | 0.829 | 0.999 | 0.829 | 7.218774 |
| 56-001 | Bothnian Sea  | 0.556 | 0.567 | 0.556 | 4.097142 |
| 56-002 | Bothnian Sea  | 0.805 | 0.995 | 0.805 | 7.18987  |
| 56-003 | Bothnian Sea  | 0.825 | 0.995 | 0.825 | 7.18987  |
| 57-001 | Bothnian Sea  | 0.525 | 0.323 | 0.525 | 2.333998 |
| 57-002 | Bothnian Sea  | 0.715 | 0.832 | 0.715 | 6.012032 |
| 57-003 | Bothnian Sea  | 0.828 | 1,000 | 0.828 | 7.226    |
| 58-001 | Baltic Proper | 0.26  | 0.027 | 0.26  | 0.195102 |
| 58-002 | Baltic Proper | 0.667 | 0.863 | 0.667 | 6.236038 |
| 59-001 | Baltic Proper | 0.28  | 0.078 | 0.28  | 0.563628 |
| 59-002 | Baltic Proper | 0.696 | 0.837 | 0.696 | 6.048162 |
| 60-001 | Baltic Proper | 0.678 | 0.624 | 0.678 | 4.509024 |
| 6-001  | Bothnian Bay  | 0.782 | 0.987 | 0.782 | 7.132062 |

|        |               |       |       |       |          |
|--------|---------------|-------|-------|-------|----------|
| 61-001 | Baltic Proper | 0.091 | 0.069 | 0.091 | 0.498594 |
| 61-002 | Baltic Proper | 0.136 | 0.089 | 0.136 | 0.643114 |
| 61-003 | Baltic Proper | 0.158 | 0.092 | 0.158 | 0.664792 |
| 61-004 | Baltic Proper | 0.169 | 0.093 | 0.169 | 0.672018 |
| 61-005 | Baltic Proper | 0.167 | 0.087 | 0.167 | 0.628662 |
| 61-006 | Baltic Proper | 0.183 | 0.094 | 0.183 | 0.679244 |
| 61-007 | Baltic Proper | 0.061 | 0.048 | 0.061 | 0.346848 |
| 61-008 | Baltic Proper | 0.078 | 0.051 | 0.078 | 0.368526 |
| 61-009 | Baltic Proper | 0.183 | 0.094 | 0.183 | 0.679244 |
| 61-010 | Baltic Proper | 0.422 | 0.336 | 0.422 | 2.427936 |
| 61-011 | Baltic Proper | 0.259 | 0.131 | 0.259 | 0.946606 |
| 61-012 | Baltic Proper | 0.292 | 0.148 | 0.292 | 1.069448 |
| 61-013 | Baltic Proper | 0.32  | 0.251 | 0.32  | 1.813726 |
| 61-014 | Baltic Proper | 0.419 | 0.324 | 0.419 | 2.341224 |
| 61-015 | Baltic Proper | 0.21  | 0.07  | 0.21  | 0.50582  |
| 61-016 | Baltic Proper | 0.219 | 0.135 | 0.219 | 0.97551  |
| 61-017 | Baltic Proper | 0.325 | 0.26  | 0.325 | 1.87876  |
| 61-018 | Baltic Proper | 0.336 | 0.27  | 0.336 | 1.95102  |
| 61-019 | Baltic Proper | 0.377 | 0.305 | 0.377 | 2.20393  |
| 61-020 | Baltic Proper | 0.409 | 0.323 | 0.409 | 2.333998 |
| 61-021 | Baltic Proper | 0.358 | 0.122 | 0.358 | 0.881572 |
| 61-022 | Baltic Proper | 0.425 | 0.305 | 0.425 | 2.20393  |
| 61-023 | Baltic Proper | 0.342 | 0.207 | 0.342 | 1.495782 |
| 61-024 | Baltic Proper | 0.428 | 0.333 | 0.428 | 2.406258 |
| 61-025 | Baltic Proper | 0.439 | 0.345 | 0.439 | 2.49297  |
| 61-026 | Baltic Proper | 0.347 | 0.29  | 0.347 | 2.09554  |
| 61-027 | Baltic Proper | 0.435 | 0.339 | 0.435 | 2.449614 |
| 61-028 | Baltic Proper | 0.346 | 0.308 | 0.346 | 2.225608 |
| 61-029 | Baltic Proper | 0.449 | 0.343 | 0.449 | 2.478518 |
| 61-030 | Baltic Proper | 0.25  | 0.057 | 0.25  | 0.411882 |
| 61-031 | Baltic Proper | 0.355 | 0.18  | 0.355 | 1.30068  |
| 61-032 | Baltic Proper | 0.142 | 0.083 | 0.142 | 0.599758 |
| 61-033 | Baltic Proper | 0.151 | 0.087 | 0.151 | 0.628662 |
| 61-034 | Baltic Proper | 0.208 | 0.192 | 0.208 | 1.387392 |
| 61-035 | Baltic Proper | 0.22  | 0.2   | 0.22  | 1.4452   |
| 61-036 | Baltic Proper | 0.365 | 0.268 | 0.365 | 1.936568 |
| 61-037 | Baltic Proper | 0.419 | 0.333 | 0.419 | 2.406258 |
| 61-038 | Baltic Proper | 0.439 | 0.338 | 0.439 | 2.442388 |
| 61-039 | Baltic Proper | 0.343 | 0.191 | 0.343 | 1.380166 |
| 61-040 | Baltic Proper | 0.427 | 0.337 | 0.427 | 2.435162 |
| 61-041 | Baltic Proper | 0.442 | 0.342 | 0.442 | 2.471292 |
| 61-042 | Baltic Proper | 0.443 | 0.345 | 0.443 | 2.49297  |
| 61-043 | Baltic Proper | 0.45  | 0.345 | 0.45  | 2.49297  |
| 61-044 | Baltic Proper | 0.489 | 0.344 | 0.489 | 2.485744 |
| 61-045 | Baltic Proper | 0.387 | 0.313 | 0.387 | 2.261738 |
| 61-046 | Baltic Proper | 0.429 | 0.339 | 0.429 | 2.449614 |
| 61-047 | Baltic Proper | 0.438 | 0.342 | 0.438 | 2.471292 |
| 61-048 | Baltic Proper | 0.375 | 0.169 | 0.375 | 1.221194 |
| 61-049 | Baltic Proper | 0.41  | 0.266 | 0.41  | 1.922116 |
| 61-050 | Baltic Proper | 0.434 | 0.337 | 0.434 | 2.435162 |

|            |               |       |       |       |          |
|------------|---------------|-------|-------|-------|----------|
| 61-051     | Baltic Proper | 0.451 | 0.345 | 0.451 | 2.49297  |
| 61-052     | Baltic Proper | 0.427 | 0.292 | 0.427 | 2.109992 |
| 61-053     | Baltic Proper | 0.407 | 0.248 | 0.407 | 1.792048 |
| 61-054     | Baltic Proper | 0.438 | 0.342 | 0.438 | 2.471292 |
| 61-055     | Baltic Proper | 0.445 | 0.345 | 0.445 | 2.49297  |
| 61-056     | Baltic Proper | 0.435 | 0.343 | 0.435 | 2.478518 |
| 61-057     | Baltic Proper | 0.323 | 0.129 | 0.323 | 0.932154 |
| 61-058     | Baltic Proper | 0.334 | 0.218 | 0.334 | 1.575268 |
| 61-059     | Baltic Proper | 0.486 | 0.345 | 0.486 | 2.49297  |
| 62-001     | Baltic Proper | 0.72  | 0.789 | 0.72  | 5.701314 |
| 624600-001 | Bothnian Sea  | 0.865 | 0.993 | 0.865 | 7.175418 |
| 63-001     | Baltic Proper | 0.434 | 0.396 | 0.434 | 2.861496 |
| 63-002     | Baltic Proper | 0.773 | 1,000 | 0.773 | 7.226    |
| 64-001     | Baltic Proper | 0.63  | 0.315 | 0.63  | 2.27619  |
| 64-002     | Baltic Proper | 0.689 | 0.755 | 0.689 | 5.45563  |
| 65-001     | Baltic Proper | 0.228 | 0.301 | 0.228 | 2.175026 |
| 65-002     | Baltic Proper | 0.405 | 0.526 | 0.405 | 3.800876 |
| 65-003     | Baltic Proper | 0.166 | 0.278 | 0.166 | 2.008828 |
| 65-004     | Baltic Proper | 0.277 | 0.397 | 0.277 | 2.868722 |
| 65-005     | Baltic Proper | 0.397 | 0.543 | 0.397 | 3.923718 |
| 65-006     | Baltic Proper | 0.463 | 0.69  | 0.463 | 4.98594  |
| 65-007     | Baltic Proper | 0.342 | 0.264 | 0.342 | 1.907664 |
| 65-008     | Baltic Proper | 0.547 | 0.786 | 0.547 | 5.679636 |
| 65-009     | Baltic Proper | 0.174 | 0.044 | 0.174 | 0.317944 |
| 65-010     | Baltic Proper | 0.286 | 0.25  | 0.286 | 1.8065   |
| 65-011     | Baltic Proper | 0.548 | 0.798 | 0.548 | 5.766348 |
| 65-012     | Baltic Proper | 0.647 | 0.914 | 0.647 | 6.604564 |
| 65-013     | Baltic Proper | 0.712 | 0.997 | 0.712 | 7.204322 |
| 652400-001 | Bothnian Bay  | 0.822 | 0.999 | 0.822 | 7.218774 |
| 66-001     | Baltic Proper | 0.621 | 0.754 | 0.621 | 5.448404 |
| 66-002     | Baltic Proper | 0.986 | 0.995 | 0.986 | 7.18987  |
| 67-001     | Baltic Proper | 0.063 | 0.039 | 0.063 | 0.281814 |
| 67-002     | Baltic Proper | 0.122 | 0.069 | 0.122 | 0.498594 |
| 67-003     | Baltic Proper | 0.139 | 0.063 | 0.139 | 0.455238 |
| 67-004     | Baltic Proper | 0.147 | 0.075 | 0.147 | 0.54195  |
| 67-005     | Baltic Proper | 0.056 | 0.031 | 0.056 | 0.224006 |
| 67-006     | Baltic Proper | 0.059 | 0.034 | 0.059 | 0.245684 |
| 67-007     | Baltic Proper | 0.126 | 0.07  | 0.126 | 0.50582  |
| 67-008     | Baltic Proper | 0.074 | 0.027 | 0.074 | 0.195102 |
| 67-009     | Baltic Proper | 0.117 | 0.075 | 0.117 | 0.54195  |
| 67-010     | Baltic Proper | 0.346 | 0.85  | 0.346 | 6.1421   |
| 67-011     | Baltic Proper | 0.116 | 0.155 | 0.116 | 1.12003  |
| 67-012     | Baltic Proper | 0.185 | 0.275 | 0.185 | 1.98715  |
| 67-013     | Baltic Proper | 0.194 | 0.312 | 0.194 | 2.254512 |
| 67-014     | Baltic Proper | 0.131 | 0.082 | 0.131 | 0.592532 |
| 67-015     | Baltic Proper | 0.257 | 0.341 | 0.257 | 2.464066 |
| 67-016     | Baltic Proper | 0.474 | 0.939 | 0.474 | 6.785214 |
| 67-017     | Baltic Proper | 0.561 | 0.93  | 0.561 | 6.72018  |
| 67-018     | Baltic Proper | 0.441 | 0.916 | 0.441 | 6.619016 |
| 67-019     | Baltic Proper | 0.58  | 0.94  | 0.58  | 6.79244  |

|        |               |       |       |       |          |
|--------|---------------|-------|-------|-------|----------|
| 67-020 | Baltic Proper | 0.135 | 0.145 | 0.135 | 1.04777  |
| 67-021 | Baltic Proper | 0.147 | 0.15  | 0.147 | 1.0839   |
| 67-022 | Baltic Proper | 0.157 | 0.15  | 0.157 | 1.0839   |
| 67-023 | Baltic Proper | 0.21  | 0.291 | 0.21  | 2.102766 |
| 67-024 | Baltic Proper | 0.5   | 0.852 | 0.5   | 6.156552 |
| 67-025 | Baltic Proper | 0.583 | 0.943 | 0.583 | 6.814118 |
| 67-026 | Baltic Proper | 0.344 | 0.701 | 0.344 | 5.065426 |
| 67-027 | Baltic Proper | 0.576 | 0.94  | 0.576 | 6.79244  |
| 67-028 | Baltic Proper | 0.389 | 0.311 | 0.389 | 2.247286 |
| 67-029 | Baltic Proper | 0.581 | 0.766 | 0.581 | 5.535116 |
| 67-030 | Baltic Proper | 0.534 | 0.427 | 0.534 | 3.085502 |
| 67-031 | Baltic Proper | 0.45  | 0.309 | 0.45  | 2.232834 |
| 67-032 | Baltic Proper | 0.565 | 0.781 | 0.565 | 5.643506 |
| 67-033 | Baltic Proper | 0.592 | 0.805 | 0.592 | 5.81693  |
| 67-034 | Baltic Proper | 0.444 | 0.51  | 0.444 | 3.68526  |
| 67-035 | Baltic Proper | 0.53  | 0.86  | 0.53  | 6.21436  |
| 67-036 | Baltic Proper | 0.697 | 0.979 | 0.697 | 7.074254 |
| 67-037 | Baltic Proper | 0.789 | 0.984 | 0.789 | 7.110384 |
| 68-001 | Baltic Proper | 0.197 | 0.036 | 0.197 | 0.260136 |
| 68-002 | Baltic Proper | 0.654 | 0.907 | 0.654 | 6.553982 |
| 68-003 | Baltic Proper | 0.765 | 0.597 | 0.765 | 4.313922 |
| 68-004 | Baltic Proper | 0.798 | 0.979 | 0.798 | 7.074254 |
| 69-001 | Baltic Proper | 0.406 | 0.27  | 0.406 | 1.95102  |
| 69-002 | Baltic Proper | 0.755 | 0.987 | 0.755 | 7.132062 |
| 70-001 | Baltic Proper | 0.334 | 0.492 | 0.334 | 3.555192 |
| 70-002 | Baltic Proper | 0.484 | 0.555 | 0.484 | 4.01043  |
| 7-001  | Bothnian Bay  | 0.77  | 0.998 | 0.77  | 7.211548 |
| 7-004  | Bothnian Bay  | 0.763 | 0.996 | 0.763 | 7.197096 |
| 7-005  | Bothnian Bay  | 0.625 | 0.995 | 0.625 | 7.18987  |
| 7-006  | Bothnian Bay  | 0.666 | 0.998 | 0.666 | 7.211548 |
| 7-007  | Bothnian Bay  | 0.746 | 0.985 | 0.746 | 7.11761  |
| 7-008  | Bothnian Bay  | 0.808 | 0.99  | 0.808 | 7.15374  |
| 71-001 | Baltic Proper | 0.391 | 0.244 | 0.391 | 1.763144 |
| 71-002 | Baltic Proper | 0.4   | 0.114 | 0.4   | 0.823764 |
| 71-003 | Baltic Proper | 0.554 | 0.379 | 0.554 | 2.738654 |
| 71-004 | Baltic Proper | 0.617 | 0.691 | 0.617 | 4.993166 |
| 72-001 | Baltic Proper | 0.488 | 0.454 | 0.488 | 3.280604 |
| 72-002 | Baltic Proper | 0.664 | 0.866 | 0.664 | 6.257716 |
| 73-001 | Baltic Proper | 0.399 | 0.149 | 0.399 | 1.076674 |
| 73-002 | Baltic Proper | 0.542 | 0.536 | 0.542 | 3.873136 |
| 73-003 | Baltic Proper | 0.713 | 0.916 | 0.713 | 6.619016 |
| 74-001 | Baltic Proper | 0.244 | 0.383 | 0.244 | 2.767558 |
| 74-002 | Baltic Proper | 0.562 | 0.817 | 0.562 | 5.903642 |
| 74-003 | Baltic Proper | 0.474 | 0.818 | 0.474 | 5.910868 |
| 74-004 | Baltic Proper | 0.267 | 0.169 | 0.267 | 1.221194 |
| 74-005 | Baltic Proper | 0.597 | 0.879 | 0.597 | 6.351654 |
| 74-006 | Baltic Proper | 0.618 | 0.91  | 0.618 | 6.57566  |
| 74-007 | Baltic Proper | 0.736 | 0.979 | 0.736 | 7.074254 |
| 74-008 | Baltic Proper | 0.544 | 0.788 | 0.544 | 5.694088 |
| 74-009 | Baltic Proper | 0.562 | 0.745 | 0.562 | 5.38337  |

|        |               |       |       |       |          |
|--------|---------------|-------|-------|-------|----------|
| 74-010 | Baltic Proper | 0.727 | 0.971 | 0.727 | 7.016446 |
| 74-011 | Baltic Proper | 0.516 | 0.712 | 0.516 | 5.144912 |
| 74-012 | Baltic Proper | 0.736 | 0.983 | 0.736 | 7.103158 |
| 75-001 | Baltic Proper | 0.489 | 0.555 | 0.489 | 4.01043  |
| 75-002 | Baltic Proper | 0.639 | 0.69  | 0.639 | 4.98594  |
| 75-003 | Baltic Proper | 0.613 | 0.81  | 0.613 | 5.85306  |
| 75-004 | Baltic Proper | 0.599 | 0.785 | 0.599 | 5.67241  |
| 75-005 | Baltic Proper | 0.789 | 0.997 | 0.789 | 7.204322 |
| 76-001 | Baltic Proper | 0.737 | 0.983 | 0.737 | 7.103158 |
| 77-001 | Baltic Proper | 0.769 | 0.757 | 0.769 | 5.470082 |
| 77-002 | Baltic Proper | 0.799 | 0.998 | 0.799 | 7.211548 |
| 77-003 | Baltic Proper | 0.805 | 0.998 | 0.805 | 7.211548 |
| 78-001 | Baltic Proper | 0.746 | 0.938 | 0.746 | 6.777988 |
| 79-001 | Baltic Proper | 0.808 | 0.996 | 0.808 | 7.197096 |
| 80-001 | Baltic Proper | 0.573 | 0.592 | 0.573 | 4.277792 |
| 80-002 | Baltic Proper | 0.689 | 0.76  | 0.689 | 5.49176  |
| 80-003 | Baltic Proper | 0.788 | 0.912 | 0.788 | 6.590112 |
| 8-001  | Bothnian Bay  | 0.705 | 0.986 | 0.705 | 7.124836 |
| 81-001 | Baltic Proper | 0.675 | 0.853 | 0.675 | 6.163778 |
| 82-001 | Baltic Proper | 0.299 | 0.501 | 0.299 | 3.620226 |
| 82-002 | Baltic Proper | 0.484 | 0.662 | 0.484 | 4.783612 |
| 82-003 | Baltic Proper | 0.663 | 0.922 | 0.663 | 6.662372 |
| 82-004 | Baltic Proper | 0.703 | 0.866 | 0.703 | 6.257716 |
| 82-005 | Baltic Proper | 0.553 | 0.771 | 0.553 | 5.571246 |
| 82-006 | Baltic Proper | 0.789 | 0.936 | 0.789 | 6.763536 |
| 83-001 | Baltic Proper | 0.614 | 0.82  | 0.614 | 5.92532  |
| 84-001 | Baltic Proper | 0.462 | 0.547 | 0.462 | 3.952622 |
| 84-002 | Baltic Proper | 0.806 | 0.977 | 0.806 | 7.059802 |
| 85-001 | Baltic Proper | 0.318 | 0.508 | 0.318 | 3.670808 |
| 85-002 | Baltic Proper | 0.729 | 0.872 | 0.729 | 6.301072 |
| 86-001 | Baltic Proper | 0.153 | 0.552 | 0.153 | 3.988752 |
| 86-002 | Baltic Proper | 0.261 | 0.811 | 0.261 | 5.860286 |
| 86-003 | Baltic Proper | 0.461 | 0.826 | 0.461 | 5.968676 |
| 86-004 | Baltic Proper | 0.39  | 0.664 | 0.39  | 4.798064 |
| 86-005 | Baltic Proper | 0.576 | 0.828 | 0.576 | 5.983128 |
| 86-006 | Baltic Proper | 0.833 | 0.977 | 0.833 | 7.059802 |
| 87-001 | Baltic Proper | 0.226 | 0.205 | 0.226 | 1.48133  |
| 87-002 | Baltic Proper | 0.402 | 0.396 | 0.402 | 2.861496 |
| 87-003 | Baltic Proper | 0.388 | 0.389 | 0.388 | 2.810914 |
| 87-004 | Baltic Proper | 0.796 | 0.998 | 0.796 | 7.211548 |
| 88-001 | Baltic Proper | 0.309 | 0.912 | 0.309 | 6.590112 |
| 88-002 | Baltic Proper | 0.519 | 0.914 | 0.519 | 6.604564 |
| 88-003 | Baltic Proper | 0.535 | 0.93  | 0.535 | 6.72018  |
| 88-004 | Baltic Proper | 0.723 | 0.929 | 0.723 | 6.712954 |
| 88-005 | Baltic Proper | 0.776 | 0.94  | 0.776 | 6.79244  |
| 88-006 | Baltic Proper | 0.816 | 0.887 | 0.816 | 6.409462 |
| 88-007 | Baltic Proper | 0.792 | 0.88  | 0.792 | 6.35888  |
| 88-008 | Baltic Proper | 0.777 | 0.948 | 0.777 | 6.850248 |
| 88-009 | Baltic Proper | 0.704 | 0.941 | 0.704 | 6.799666 |
| 88-010 | Baltic Proper | 0.731 | 0.939 | 0.731 | 6.785214 |

|        |               |       |       |       |          |
|--------|---------------|-------|-------|-------|----------|
| 88-011 | Baltic Proper | 0.794 | 0.997 | 0.794 | 7.204322 |
| 88-012 | Baltic Proper | 0.782 | 0.996 | 0.782 | 7.197096 |
| 89-001 | Baltic Proper | 0.806 | 0.998 | 0.806 | 7.211548 |
| 89-002 | Baltic Proper | 0.795 | 0.997 | 0.795 | 7.204322 |
| 90-001 | Öresund       | 0.793 | 0.997 | 0.793 | 0        |
| 90-002 | Öresund       | 0.67  | 0.988 | 0.67  | 0        |
| 90-003 | Öresund       | 0.789 | 0.994 | 0.789 | 0        |
| 9-018  | Bothnian Bay  | 0.483 | 0.658 | 0.483 | 4.754708 |
| 9-019  | Bothnian Bay  | 0.671 | 0.804 | 0.671 | 5.809704 |
| 9-020  | Bothnian Bay  | 0.692 | 0.895 | 0.692 | 6.46727  |
| 9-021  | Bothnian Bay  | 0.719 | 0.924 | 0.719 | 6.676824 |
| 9-025  | Bothnian Bay  | 0.702 | 0.919 | 0.702 | 6.640694 |
| 9-026  | Bothnian Bay  | 0.738 | 0.972 | 0.738 | 7.023672 |
| 9-027  | Bothnian Bay  | 0.756 | 0.985 | 0.756 | 7.11761  |
| 9-028  | Bothnian Bay  | 0.71  | 0.957 | 0.71  | 6.915282 |
| 9-029  | Bothnian Bay  | 0.771 | 0.98  | 0.771 | 7.08148  |
| 9-033  | Bothnian Bay  | 0.78  | 0.988 | 0.78  | 7.139288 |
| 9-034  | Bothnian Bay  | 0.783 | 0.988 | 0.783 | 7.139288 |
| 9-035  | Bothnian Bay  | 0.691 | 0.844 | 0.691 | 6.098744 |
| 9-036  | Bothnian Bay  | 0.794 | 0.989 | 0.794 | 7.146514 |
| 9-037  | Bothnian Bay  | 0.817 | 0.983 | 0.817 | 7.103158 |
| 9-038  | Bothnian Bay  | 0.547 | 0.378 | 0.547 | 2.731428 |
| 9-039  | Bothnian Bay  | 0.796 | 0.98  | 0.796 | 7.08148  |
| 9-040  | Bothnian Bay  | 0.789 | 0.971 | 0.789 | 7.016446 |
| 91-001 | Öresund       | 0.675 | 0.969 | 0.675 | 0        |
| 91-002 | Öresund       | 0.791 | 0.997 | 0.791 | 0        |
| 91-003 | Öresund       | 0.767 | 0.996 | 0.767 | 0        |
| 92-001 | Öresund       | 0.414 | 0.543 | 0.414 | 0        |
| 92-002 | Öresund       | 0.397 | 0.543 | 0.397 | 0        |
| 92-003 | Öresund       | 0.428 | 0.964 | 0.428 | 0        |
| 92-004 | Öresund       | 0.808 | 0.998 | 0.808 | 0        |
| 92-005 | Öresund       | 0.74  | 0.989 | 0.74  | 0        |
| 93-001 | Öresund       | 0.813 | 0.998 | 0.813 | 0        |
| 93-002 | Öresund       | 0.81  | 0.998 | 0.81  | 0        |
| 93-003 | Öresund       | 0.743 | 0.996 | 0.743 | 0        |
| 94-001 | Öresund       | 0.815 | 0.998 | 0.815 | 0        |
| 95-001 | Kattegat      | 0.87  | 0.998 | 0.87  | 0        |
| 95-002 | Kattegat      | 0.884 | 0.998 | 0.884 | 0        |
| 96-001 | Kattegat      | 0.429 | 0.999 | 0.429 | 0        |
| 96-002 | Kattegat      | 0.374 | 0.892 | 0.374 | 0        |
| 96-003 | Kattegat      | 0.878 | 0.989 | 0.878 | 0        |
| 96-004 | Kattegat      | 0.844 | 0.985 | 0.844 | 0        |
| 96-005 | Kattegat      | 0.863 | 0.986 | 0.863 | 0        |
| 96-006 | Kattegat      | 0.773 | 0.66  | 0.773 | 0        |
| 96-007 | Kattegat      | 0.85  | 0.997 | 0.85  | 0        |
| 97-001 | Kattegat      | 0.84  | 0.973 | 0.84  | 0        |
| 97-002 | Kattegat      | 0.93  | 0.999 | 0.93  | 0        |
| 98-001 | Kattegat      | 0.505 | 0.537 | 0.505 | 0        |
| 98-002 | Kattegat      | 0.552 | 0.537 | 0.552 | 0        |
| 98-003 | Kattegat      | 0.67  | 0.639 | 0.67  | 0        |

|        |          |       |       |       |   |
|--------|----------|-------|-------|-------|---|
| 98-004 | Kattegat | 0.656 | 0.62  | 0.656 | 0 |
| 98-005 | Kattegat | 0.702 | 0.653 | 0.702 | 0 |
| 98-006 | Kattegat | 0.416 | 0.72  | 0.416 | 0 |
| 98-007 | Kattegat | 0.247 | 0.485 | 0.247 | 0 |
| 98-008 | Kattegat | 0.446 | 0.728 | 0.446 | 0 |
| 98-009 | Kattegat | 0.562 | 0.767 | 0.562 | 0 |
| 98-010 | Kattegat | 0.616 | 0.838 | 0.616 | 0 |
| 98-011 | Kattegat | 0.659 | 0.652 | 0.659 | 0 |
| 98-012 | Kattegat | 0.381 | 0.59  | 0.381 | 0 |
| 98-013 | Kattegat | 0.391 | 0.644 | 0.391 | 0 |
| 98-014 | Kattegat | 0.384 | 0.637 | 0.384 | 0 |
| 98-015 | Kattegat | 0.365 | 0.639 | 0.365 | 0 |
| 98-016 | Kattegat | 0.762 | 0.939 | 0.762 | 0 |
| 98-017 | Kattegat | 0.815 | 0.982 | 0.815 | 0 |
| 98-018 | Kattegat | 0.838 | 0.986 | 0.838 | 0 |
| 98-019 | Kattegat | 0.835 | 0.916 | 0.835 | 0 |
| 98-020 | Kattegat | 0.775 | 0.978 | 0.775 | 0 |
| 98-021 | Kattegat | 0.813 | 0.987 | 0.813 | 0 |
| 98-022 | Kattegat | 0.812 | 0.978 | 0.812 | 0 |
| 98-023 | Kattegat | 0.809 | 0.985 | 0.809 | 0 |
| 99-001 | Kattegat | 0.881 | 0.998 | 0.881 | 0 |
